# Supplementary material for: Genetic Admixture in the Population of Wild Apple (Malus sieversii) from the Tien Shan Mountains, Kazakhstan
Source: PubMed Central journal article supplement (PMC7829876; doi:10.3390/genes12010104), 2021-01-15
Supplement: genes-12-00104-s001.pdf [file genes-12-00104-s001.pdf]

## Supplementary Information

Increased risk of genetic swamping in the progenitor of the domesticated apple (*Malus sieversii*) from the diversity hotspot, Tien Shan, Kazakhstan

**Table 1.** Summary of pairwise contemporary and historical gene flow among the four redefined groups of the three *Malus* taxa. m (migration rate) is the number of immigrants per generation. H stands for historical while C refers to contemporary. mean HN<sub>m</sub> refers to the historical effective migration rate (N<sub>m</sub>) that is the migration rate given the effective population size. C<sub>m</sub>/H<sub>m</sub> ratio was also presented as a measure of difference between the historical and contemporary gene flow. See Table 1 for the population acronyms.

|                 | <b>mean HN<sub>m</sub></b> | <b>mean H<sub>m</sub></b> | <b>lower H<sub>m</sub></b> | <b>upper H<sub>m</sub></b> | <b>mean C<sub>m</sub></b> | <b>95% CI of C<sub>m</sub></b> | <b>C<sub>m</sub>/H<sub>m</sub></b> |
|-----------------|----------------------------|---------------------------|----------------------------|----------------------------|---------------------------|--------------------------------|------------------------------------|
| m_TalKok->Ala   | 1.795163                   | 0.000726                  | 0.000503                   | 0.000925                   | 0.021800                  | 0.018000                       | 30.03                              |
| m_TalEW->Ala    | 1.029359                   | 0.000416                  | 0.000161                   | 0.000644                   | 0.024800                  | 0.022300                       | 59.58                              |
| m_Dom->Ala      | 0.910013                   | 0.000368                  | 0.000141                   | 0.000563                   | 0.030400                  | 0.027800                       | 82.61                              |
| m_Ala->TalKol   | 1.898579                   | 0.001408                  | 0.001116                   | 0.001661                   | 0.035300                  | 0.018700                       | 25.07                              |
| m_TalEW->TalKok | 0.356213                   | 0.000264                  | 0.000000                   | 0.000490                   | 0.079700                  | 0.039400                       | 301.73                             |
| m_Dom->TalKok   | 0.723443                   | 0.000536                  | 0.000272                   | 0.000790                   | 0.061000                  | 0.037300                       | 113.71                             |
| m_Ala->TalEW    | 0.540516                   | 0.001184                  | 0.000702                   | 0.001638                   | 0.010800                  | 0.010300                       | 9.12                               |
| m_TalKol->TalEW | 4.520675                   | 0.013293                  | 0.009904                   | 0.015166                   | 0.022000                  | 0.014400                       | 1.65                               |
| m_Dom->TalEW    | 0.632382                   | 0.001385                  | 0.000843                   | 0.001919                   | 0.031200                  | 0.028400                       | 22.52                              |
| m_Ala->Dom      | 0.928644                   | 0.001466                  | 0.000715                   | 0.001669                   | 0.084000                  | 0.025500                       | 57.29                              |
| m_TalKok->Dom   | 0.566246                   | 0.000894                  | 0.000477                   | 0.001272                   | 0.044400                  | 0.019800                       | 49.66                              |
| m_TalEW->Dom    | 1.283492                   | 0.002027                  | 0.001033                   | 0.002821                   | 0.097900                  | 0.034500                       | 48.31                              |

**Table S2.** Detailed information on 17 microsatellite loci utilized in the study

| No. | SSR primer   | Fluorescently dye | Sequence                                                                       | Allele range | Motif | Reference                               |
|-----|--------------|-------------------|--------------------------------------------------------------------------------|--------------|-------|-----------------------------------------|
| 1   | MdBHLH3      | FAM               | CAACTCCCCTTATTCTTCTTCTCTC<br>CACCTGACCTTCTCTCTACCTCTAC<br>GGCACAAGCACAAGGAAACA | -            | AG    |                                         |
| 2   | NZmsPal8     | HEX               | GTTTGAGCCAGTCCATTTTCCCTA<br>T<br>TCGATGAACAAGGCCCAAAG                          | -            | AG    | Faramarzi et al., [31]                  |
| 3   | NzmsPal13    | FAM               | GTTTAGGGGGACGGAAGGAACAA<br>G                                                   | -            | AG    |                                         |
| 4   | NzmsPal36    | HEX               | CCTCAACAAATATAAGACTCTCTC<br>GTTTCTCCACTCTGTCCGTACATT                           | -            | AG    |                                         |
| 5   | P188-CH03d07 | FAM               | CAAATCAATGCAAAACTGTCA<br>GGCTTCTGGCCATGATTTA<br>GGACCTGCTTCCCCTTATTC           | 186-226      | AG    |                                         |
| 6   | P290-Hi03a10 | HEX               | GTTTCAGGGAACCTTGTTTGATGG<br>GAAGGAAATCATCATCAAGACG                             | 206-290      | AG    | Dong, Y. et al., [32]                   |
| 7   | P300-Hi08h12 | FAM               | GTTTCAAGACCATGGAACAACCTTG<br>G                                                 | 151-203      | GAA   |                                         |
| 8   | CH05g08      | FAM               | CCAAGACCAAGGCAACATTT<br>CCCTTCACCTCATTCTCACC                                   | 161-179      | AG    |                                         |
| 9   | CH03e03      | HEX               | GCACATTCTGCCTTATCTTGG<br>AAAACCCACAAATAGCGCC                                   | 106-216      | AG    | Silfverberg-Dilworth, Eve, et al., [33] |
| 10  | Hi23g02      | FAM               | TTTTCCAGGATATACTACCCTTCC<br>GTTTCTTCGAGGTCAGGGTTTG                             | 230-257      | CAA   |                                         |
| 11  | CH03a09      | HEX               | GCCAGGTGTGACTCCTTCTC                                                           | 125-143      | AG    |                                         |

|    |          |     |                                                                         |         |    |
|----|----------|-----|-------------------------------------------------------------------------|---------|----|
| 12 | CH05a05  | FAM | CTGCAGCTGCTGAAACTGG<br>TGTATCAGTGGTTTGCATGAAC<br>GCAACTCCCAACTCTTCTTTCT | 198-230 | AG |
| 13 | CH01c06  | HEX | TTCCCCATCATCGATCTCTC<br>AAACTGAAGCCATGAGGGC                             | 146-188 | AG |
| 14 | CH01f03b | FAM | GAGAAGCAAATGCAAAACCC<br>CTCCCCGGCTCCTATTCTAC                            | 137-183 | AG |
| 15 | CH03c02  | HEX | TCACTATTTACGGGATCAAGCA<br>GTGCAGAGTCTTTGACAAGGC                         | 166-136 | AG |
| 16 | CH04c07  | FAM | GGCCTTCCATGTCTCAGAAG<br>CCTCATGCCCTCCACTAACA                            | 98-135  | AG |
| 17 | CH02a03  | HEX | AGAAGTTTTACGGGTGCC<br>TGGAGACATGCAGAATGGAG                              | 144-170 | AG |

---

**Table S3.** Summary of PCR amplification conditions

| <b>Primer number</b> | <b>Reference</b>                        | <b>PCR condition</b>                                                                                                                                                   |
|----------------------|-----------------------------------------|------------------------------------------------------------------------------------------------------------------------------------------------------------------------|
| 1,2,3,4              | Faramarzi et al., [31]                  | 94 °C 2 min 30 sec, 4 cycles: 94 °C 30 sec, 65 °C 1 min, 72 °C 1 min, 30 cycle: 94 °C 30 sec, 60 °C 1 min and 72 °C 1 min; 72 °C 5 min (dropping 1 °C per cycle)       |
| 5,6,7                | Dong, Y. et al., [32]                   | 94 °C 4 min, 4 cycles: 94 °C 50 sec, 65 °C 55 sec, 72 °C 1 min, 30 cycle: 94 °C 50 sec, 65 °C 55 sec and 72 °C 1 min; 72 °C 5 min (dropping 1 °C per cycle)            |
| 8,9,10,12            | Silfverberg-Dilworth, Eve, et al., [33] | 94 °C 5 min, 10 cycles: 94 °C 30 sec, 58–53 °C 45 sec (dropping 0.5 °C per cycle) and 72 °C 1 min, 25 cycles: 94 °C 30 sec, 53 °C 45 sec and 72 °C 1 min; 72 °C 15 sec |
| 11,13,14,15,16,17    |                                         | 94 °C 5 min, 38 cycles: 94 °C 30 sec, 60 °C 30 sec and 72 °C 1 min, 72 °C 10 min                                                                                       |

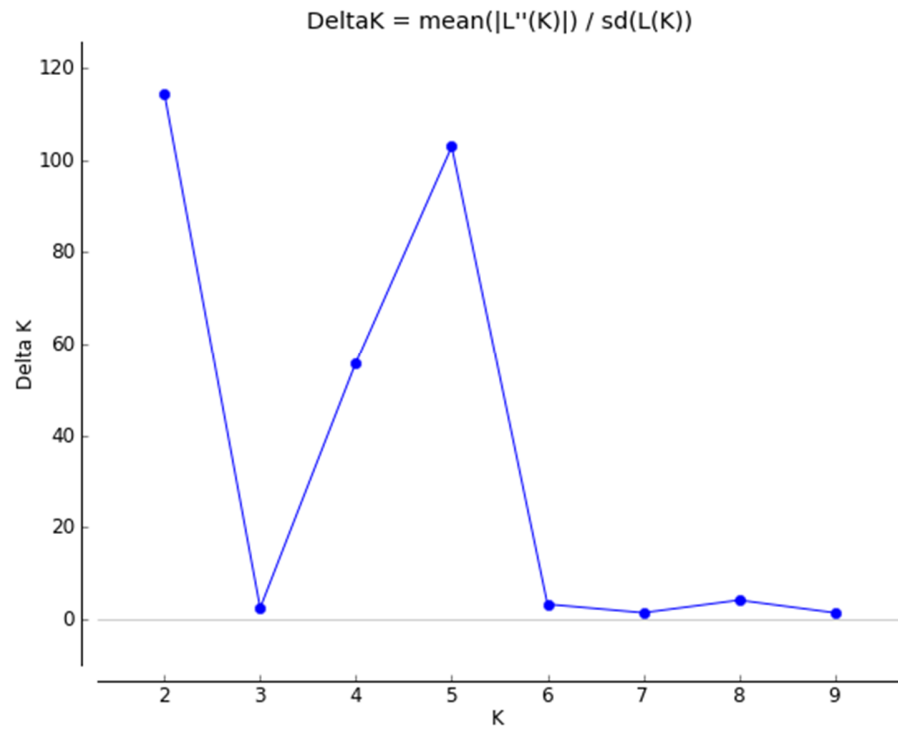

**Figure S1.** Delta K plot. Delta K values for each of K clusters from 2 to 9 were estimated by method of Evanno et al.,[43].

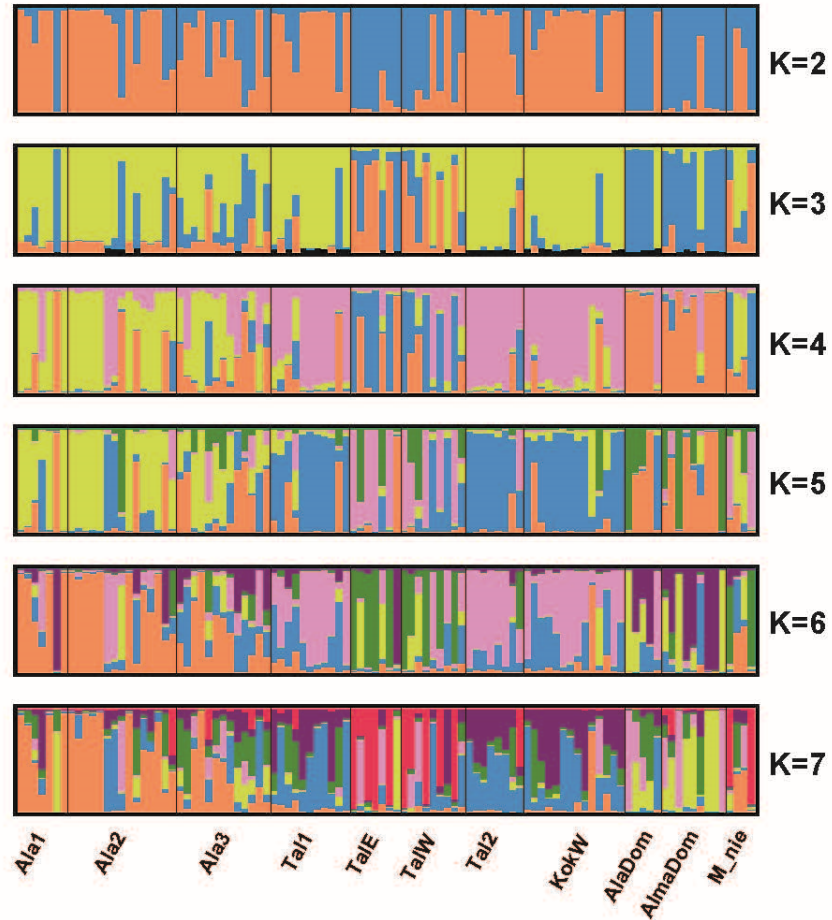

**Figure S2.** Bar plots of  $K = 2$  to  $K = 7$  from the Bayesian model-based group assignment on the 11 populations of the three *Malus* taxa with 13 nuclear SSRs. Populations are separated by solid vertical black lines. Colors represent assignments of loci into each of the 2–7 estimated groups. See Table 1 for population abbreviations.
